# Supplementary material for: The pUL37 tegument protein guides alpha-herpesvirus retrograde axonal transport to promote neuroinvasion
Source: PubMed Central journal article supplement (PMC5749899; doi:10.1371/journal.ppat.1006741), 2017-12-07

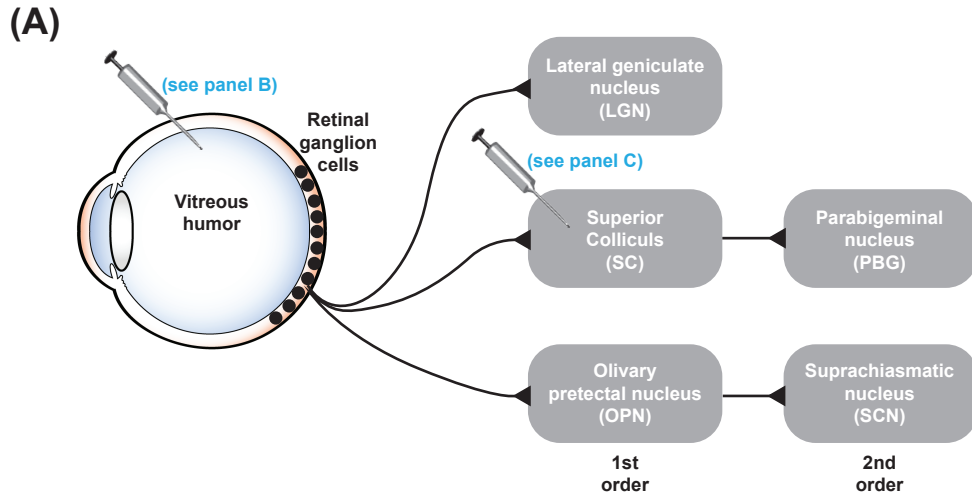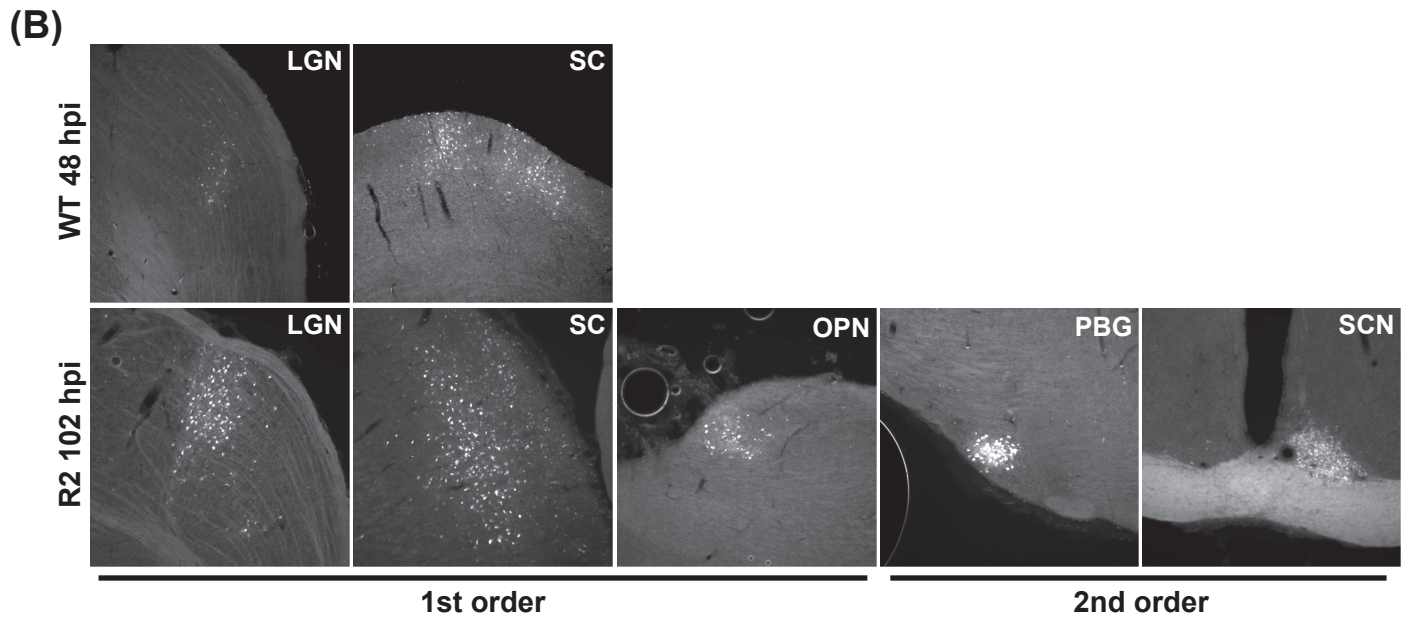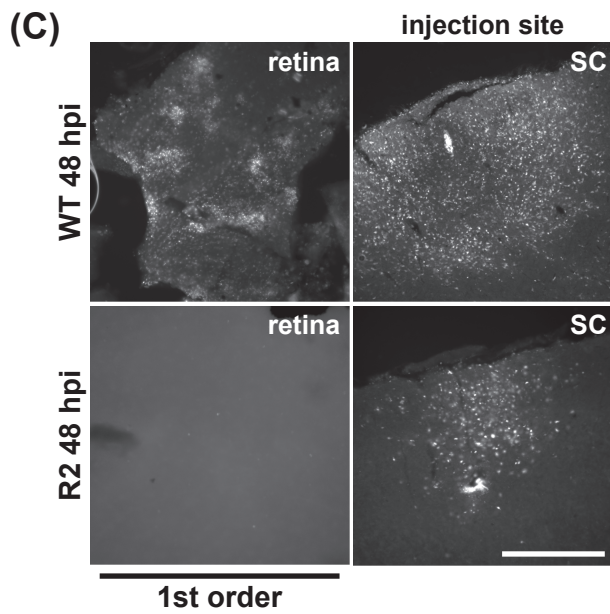

Supplement: ppat.1006741.s004.pdf [file ppat.1006741.s004.pdf]
