# Supplementary material for: The pUL37 tegument protein guides alpha-herpesvirus retrograde axonal transport to promote neuroinvasion
Source: PubMed Central journal article supplement (PMC5749899; doi:10.1371/journal.ppat.1006741), 2017-12-07
Supplement: ppat.1006741.s006.pdf [file ppat.1006741.s006.pdf]

**Supplemental Table 1: Acid changes encoded by PRV mutated in pUL37 regions 1 through 3 (R1, R2, R3).**

| <b>pUL37 Allele</b> | <b>Amino Acid Substitutions</b>       |
|---------------------|---------------------------------------|
| R1                  | V249R / R254A / R285A / D287A / H311A |
| R2                  | H421A / H425A / Q324A / D362A / R365A |
| R3                  | K203A / P204Q / D239A / E240A / D295A |
