# Supplementary material for: The pUL37 tegument protein guides alpha-herpesvirus retrograde axonal transport to promote neuroinvasion
Source: PubMed Central journal article supplement (PMC5749899; doi:10.1371/journal.ppat.1006741), 2017-12-07
Supplement: ppat.1006741.s007.pdf [file ppat.1006741.s007.pdf]

**Supplemental Table 2: PRV and HSV-1 strains used in this study.**

| Strain                                                         | UL37 allele | Capsid fusion      | Tegument fusion | Source                  |
|----------------------------------------------------------------|-------------|--------------------|-----------------|-------------------------|
| <b>replication kinetics / axonal transport / neuroinvasion</b> |             |                    |                 |                         |
| PRV-GS4284                                                     | WT          | pUL25/mCherry      | -               | <i>Bohannon, 2012</i>   |
| PRV-GS5321                                                     | R1          | pUL25/mCherry      | -               | <i>Pitts, 2014</i>      |
| PRV-GS5604                                                     | R2          | pUL25/mCherry      | -               | <i>Pitts, 2014</i>      |
| PRV-GS5350                                                     | R3          | pUL25/mCherry      | -               | <i>Pitts, 2014</i>      |
| PRV-GS4379                                                     | WT          | pUL25/eGFP         | -               | <i>Bohannon, 2012</i>   |
| PRV-GS2564                                                     | WT          | gG::CMV>eGFP       | -               | This study              |
| PRV-GS6145                                                     | R2          | gG::CMV>eGFP       | -               | This study              |
| HSV1-GS5923                                                    | WT          | -                  | -               | <i>Richards, 2016</i>   |
| HSV1-GS6264                                                    | R2          | -                  | -               | This study              |
| HSV1-GS4553                                                    | WT          | pUL25/mCherry      | -               | <i>Huffmaster, 2015</i> |
| HSV1-GS6298                                                    | R2          | pUL25/mCherry      | -               | This study              |
| HSV1-GS4677                                                    | WT          | pUL25/eGFP         | -               | This study              |
| <b>virion fusion-based entry and disassembly</b>               |             |                    |                 |                         |
| PRV-GS5179                                                     | WT          | pUL25/mCherry      | gD-eGFP         | This study              |
| PRV-GS6032                                                     | R2          | pUL25/mCherry      | gD-eGFP         | This study              |
| PRV-GS5507                                                     | WT          | pUL25/mCherry      | eGFP-pUL36      | <i>Huffmaster, 2015</i> |
| PRV-GS6105                                                     | R2          | pUL25/mCherry      | eGFP-pUL36      | This study              |
| PRV-GS5976                                                     | WT          | pUL25/mCherry      | pUL37-eGFP      | This study              |
| PRV-GS6131                                                     | R2          | pUL25/mCherry      | pUL37-eGFP      | This study              |
| PRV-GS6063                                                     | WT          | pUL25/mCherry      | pUL47-eGFP      | This study              |
| PRV-GS6065                                                     | R2          | pUL25/mCherry      | pUL47-eGFP      | This study              |
| PRV-GS6064                                                     | WT          | pUL25/mCherry      | pUL49-eGFP      | This study              |
| PRV-GS6066                                                     | R2          | pUL25/mCherry      | pUL49-eGFP      | This study              |
| PRV-GS1968                                                     | WT          | -                  | -               | <i>Leelawong, 2011</i>  |
| PRV-GS3800                                                     | WT          | $\beta$ -lac-pUL35 | -               | This study              |
| PRV-GS6366                                                     | R2          | $\beta$ -lac-pUL35 | -               | This study              |
| HSV1-GS6394                                                    | WT          | pUL25/mCherry      | eGFP-pUL47      | This study              |
| HSV1-GS6395                                                    | R2          | pUL25/mCherry      | eGFP-pUL47      | This study              |
