# Supplementary material for: The pUL37 tegument protein guides alpha-herpesvirus retrograde axonal transport to promote neuroinvasion
Source: PubMed Central journal article supplement (PMC5749899; doi:10.1371/journal.ppat.1006741), 2017-12-07
Supplement: ppat.1006741.s008.pdf [file ppat.1006741.s008.pdf]

**Supplemental Table 3: Data collection and refinement statistics for N-terminus of R2-mutant PRV pUL37**

|                                                    | <b>PRV UL37N-R2</b>    |
|----------------------------------------------------|------------------------|
| <b>Data collection<sup>a</sup></b>                 |                        |
| Space group                                        | P222 <sub>1</sub>      |
| Cell dimensions                                    |                        |
| a, b, c (Å)                                        | 51.28, 68.70, 156.23   |
| α, β, γ (°)                                        | 90, 90, 90             |
| Resolution (Å)                                     | 48.72-2.48 (2.54-2.48) |
| R <sub>sym</sub> or R <sub>merge</sub>             | 0.126 (0.262)          |
| I/σI                                               | 14.8 (3.5)             |
| Completeness (%)                                   | 96.5 (67.4)            |
| Redundancy                                         | 5.6 (2.2)              |
| <b>Refinement</b>                                  |                        |
| Resolution (Å)                                     | 48.72-2.50             |
| No. reflections (free)                             | 19218 (1719)           |
| R <sub>work</sub> / R <sub>free</sub> <sup>b</sup> | 0.1781/0.2366          |
| No. atoms                                          | 3742                   |
| Protein                                            | 3610                   |
| Solvent                                            | 132                    |
| B-factors                                          | 45.81                  |
| Protein                                            | 45.94                  |
| Solvent                                            | 42.25                  |
| RMS <sup>c</sup> deviations                        |                        |
| Bond lengths (Å)                                   | 0.007                  |
| Bond angles (°)                                    | 0.779                  |
| Ramachandran plot                                  |                        |
| Favored (%)                                        | 97.69                  |
| Allowed (%)                                        | 2.31                   |
| Outliers (%)                                       | 0.0                    |

<sup>a</sup>Values in parentheses are for highest-resolution shell.

<sup>b</sup>R<sub>work</sub> and R<sub>free</sub> are defined as  $\frac{\sum ||F_{obs}| - |F_{calc}||}{\sum |F_{obs}|}$  for the reflections in the working or the test set, respectively.

<sup>c</sup>RMS, root mean square.

<sup>d</sup>As determined using Molprobity (molprobity.biochem.duke.edu) [Davis IW, Leaver-Fay A, Chen VB, Block JN, Kapral GJ, Wang X, et al. MolProbity: all-atom contacts and structure validation for proteins and nucleic acids. Nucleic Acids Res 2007 Jul;35(Web Server issue):W375-83. PMID: 17452350]
